# Supplementary material for: Enhanced photocatalytic H2 evolution: optimized atomic hydrogen desorption via free-electron transfer in sulfur-rich MoWS2+x on vacancy-engineered CdS crystals
Source: Royal Society of Chemistry journal article supplement (doi:10.1039/d4ta06559j), 2024-01-01
Supplement: d4ta06559j1.pdf [file d4ta06559j1.pdf]

## Supporting Information

### **Enhanced photocatalytic H<sub>2</sub> evolution: Optimized atomic hydrogen desorption via free-electron transfer in sulfur-rich MoWS<sub>2+x</sub> on vacancy-engineered CdS crystals**

Ruiding Fei<sup>a,1</sup>, Jianfeng Zhao<sup>b,1</sup>, Huinan Wang<sup>a</sup>, Huijuan Lin<sup>a</sup>, Kui Xu<sup>a</sup>, Guang Zeng<sup>b</sup>,  
Wenchao Wang<sup>c,d</sup>, Zhiping Yan<sup>a,\*</sup>

<sup>a</sup> School of Flexible Electronic (Future Technologies), Key Laboratory of Flexible Electronics (KLOFE), Nanjing Tech University, 30 South Puzhu Road, Nanjing 211816, P.R. China

<sup>b</sup> State Key Laboratory of Catalysis, Dalian Institute of Chemical Physics, Chinese Academy of Sciences, Dalian 116023, P.R. China

<sup>c</sup> School of New Energy, Nanjing University of Science & Technology, Jiangyin 214443, P.R. China

<sup>d</sup> Department of Chemistry, The University of Hong Kong, Pokfulam Road. Hong Kong SAR, P.R. China

\* Corresponding author' email address: iamzpyan@njtech.edu.cn (Z. Yan).

<sup>1</sup> Those authors contribute equally to this work.

## Table of Contents

|                                                                                                                                                                                                                                                                                                                                                    |    |
|----------------------------------------------------------------------------------------------------------------------------------------------------------------------------------------------------------------------------------------------------------------------------------------------------------------------------------------------------|----|
| <b>Figure S1.</b> (a) UV-visible absorption spectrum of $\text{MoS}_4^{2-}$ , $\text{W}^{5+}$ and $\text{W}(\text{MoS}_4)_x$ solutions. (b) the corresponding photographs for the color change of $\text{CdS}_v$ , $\text{W}^{5+}/\text{CdS}_v$ , $\text{W}(\text{MoS}_4)_x/\text{CdS}_v$ , and $\text{MoWS}_{2+x}/\text{CdS}_v$ suspensions. .... | 4  |
| <b>Figure S2.</b> SEM image of (a) $\text{CdS}_v$ and (b) $\text{MoS}_{2+x}/\text{CdS}_v$ . ....                                                                                                                                                                                                                                                   | 5  |
| <b>Figure S3.</b> SEM image of (a) $\text{CdS}$ , (b) $\text{MoS}_{2+x}/\text{CdS}$ and (c) $\text{MoWS}_{2+x}/\text{CdS}$ . ....                                                                                                                                                                                                                  | 5  |
| <b>Figure S4.</b> EPR spectra of $\text{CdS}_v$ and MWC-3. ....                                                                                                                                                                                                                                                                                    | 6  |
| <b>Figure S5.</b> (a) XPS survey spectra of Cd 3d, S 2p, Mo 3d, W 4f and S 2s. (b) A magnified view of W 4f in the XPS survey spectrum. ....                                                                                                                                                                                                       | 7  |
| <b>Figure S6.</b> Fourier transform infrared spectroscopy of MWC-3 and MWC-4. ....                                                                                                                                                                                                                                                                 | 8  |
| <b>Figure S7.</b> Hydrogen evolution rates of $\text{CdS}$ , $\text{MoS}_{2+x}/\text{CdS}$ and MWC-x' samples. ....                                                                                                                                                                                                                                | 9  |
| <b>Figure S8.</b> SEM images of MWC-3 (a) after 2 h irradiation ( $\lambda \geq 420$ nm). (b) XRD patterns of MWC-3 before and after 2 h irradiation. ....                                                                                                                                                                                         | 10 |
| <b>Figure S9.</b> The raw data from absorption test of the NIR filter. ....                                                                                                                                                                                                                                                                        | 11 |
| <b>Figure S10.</b> Photocurrent curves of $\text{CdS}$ , $\text{MoS}_{2+x}/\text{CdS}$ and MWC-3'. ....                                                                                                                                                                                                                                            | 12 |
| <b>Figure S11.</b> Mott-Schottky plots of (a) $\text{CdS}_v$ and (b) $\text{MoS}_{2+x}/\text{CdS}_v$ in 0.5 M $\text{Na}_2\text{SO}_4$ tested at 1000 Hz, 2000 Hz and 3000 Hz, respectively. ....                                                                                                                                                  | 13 |
| <b>Figure S12.</b> Fs-TA measurements after 500 nm excitation with fluence of 2.2 uJ/pulse at visible region. ....                                                                                                                                                                                                                                 | 13 |
| <b>Figure S13.</b> Density of states (DOS) diagram for (a) $\text{MoS}_{2+x}$ and (b) $\text{MoWS}_{2+x}$ (Illustrations for the respective computational models). ....                                                                                                                                                                            | 15 |
| <b>Table S1.</b> Calculated quantum yields at different wavelengths. ....                                                                                                                                                                                                                                                                          | 16 |
| <b>Table S2.</b> Composition (wt %) of the various samples based on the ICP-AES results. ....                                                                                                                                                                                                                                                      | 16 |
| <b>Table S3.</b> Comparison of $\text{H}_2$ evolution activity between molybdenum disulfide co-catalysts and cadmium sulfide based composite photocatalysts. ....                                                                                                                                                                                  | 17 |
| <b>Table S4.</b> The calculated carrier density of $\text{CdS}_v$ , $\text{MoS}_{2+x}/\text{CdS}_v$ , MWC-3 at 1000 Hz, 2000 Hz and 3000 Hz, respectively. ....                                                                                                                                                                                    | 18 |

|                                                                                                           |    |
|-----------------------------------------------------------------------------------------------------------|----|
| <b>Table S5.</b> Kinetic fitting parameters for MWC-3 at 1273 nm wavelengths after 410 nm excitation..... | 18 |
| <b>Table S6.</b> Kinetic fitting parameters for MWC-3 at 1273 nm wavelengths after 500 nm excitation..... | 18 |
| <b>References</b> .....                                                                                   | 19 |

(a)

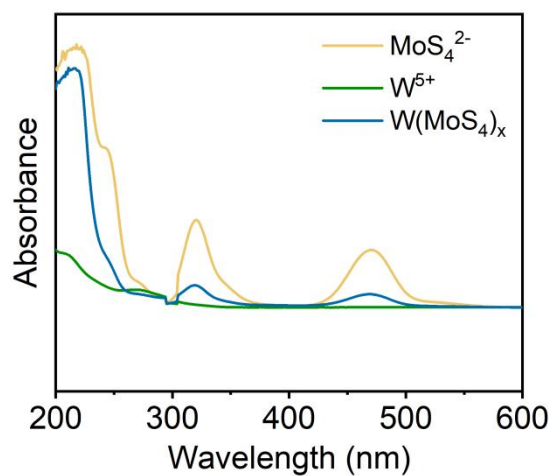

(b)

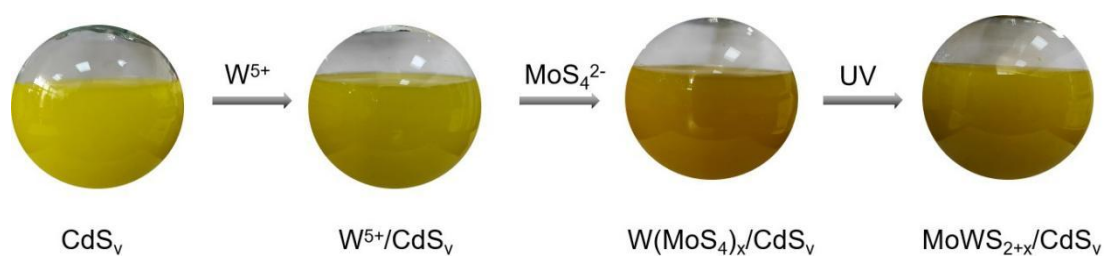

**Figure S1.** (a) UV-visible absorption spectrum of  $\text{MoS}_4^{2-}$ ,  $\text{W}^{5+}$  and  $\text{W}(\text{MoS}_4)_x$  solutions. (b) the corresponding photographs for the color change of  $\text{CdS}_v$ ,  $\text{W}^{5+}/\text{CdS}_v$ ,  $\text{W}(\text{MoS}_4)_x/\text{CdS}_v$ , and  $\text{MoWS}_{2+x}/\text{CdS}_v$  suspensions.

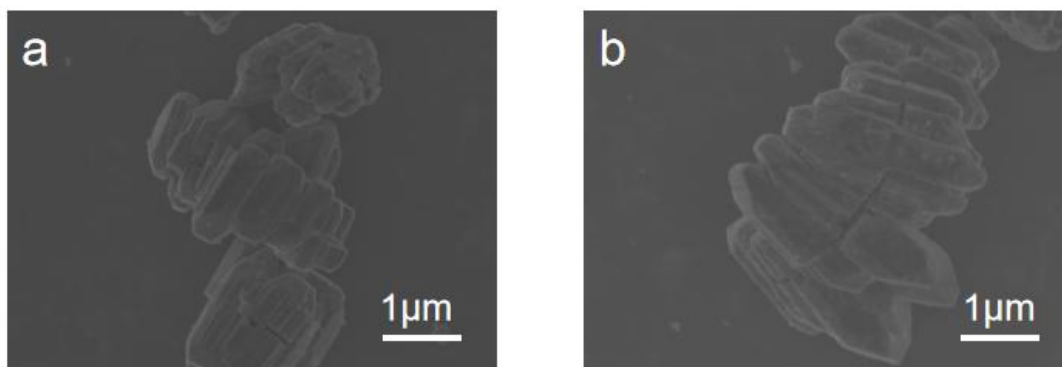

**Figure S2.** SEM image of (a) CdS<sub>v</sub> and (b) MoS<sub>2+x</sub>/CdS<sub>v</sub>.

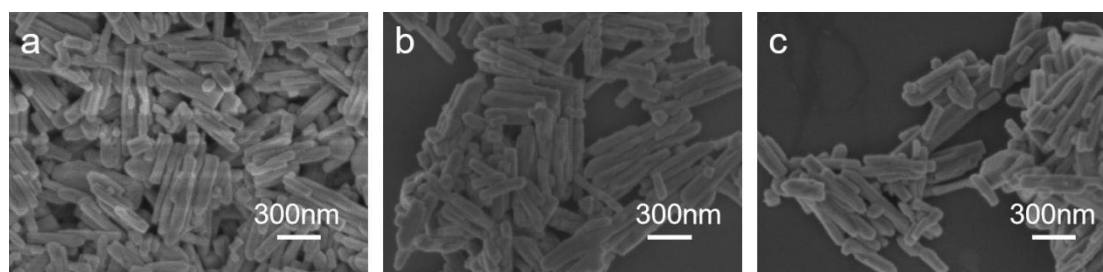

**Figure S3.** SEM image of (a) CdS, (b) MoS<sub>2+x</sub>/CdS and (c) MoWS<sub>2+x</sub>/CdS.

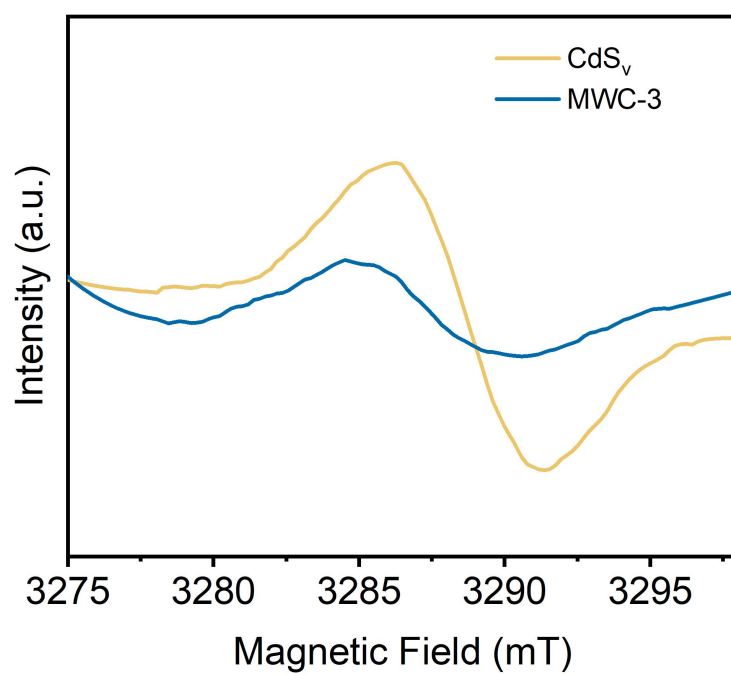

**Figure S4.** EPR spectra of CdS<sub>v</sub> and MWC-3.

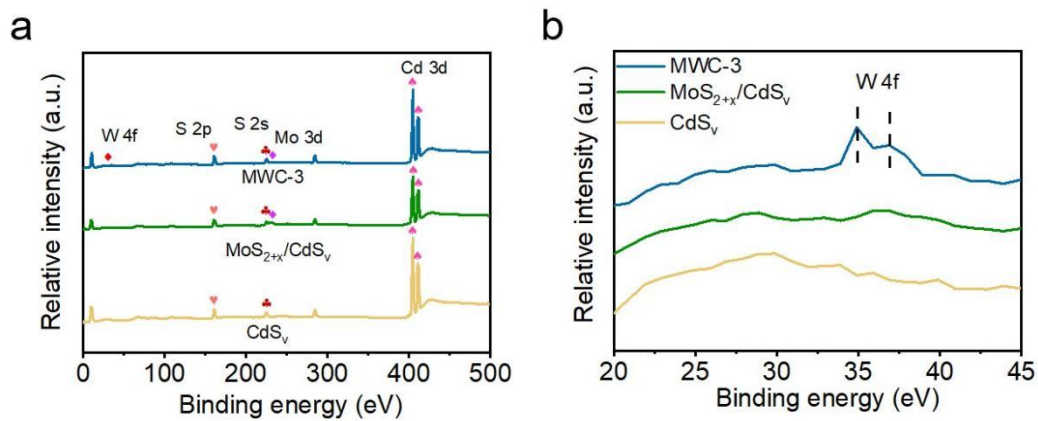

**Figure S5.** (a) XPS survey spectra of Cd 3d, S 2p, Mo 3d, W 4f and S 2s. (b) A magnified view of W 4f in the XPS survey spectrum.

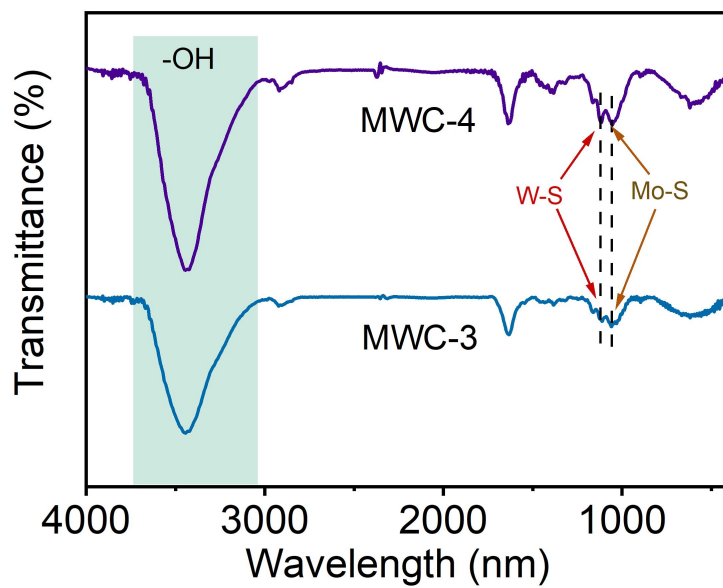

**Figure S6.** Fourier transform infrared spectroscopy of MWC-3 and MWC-4.



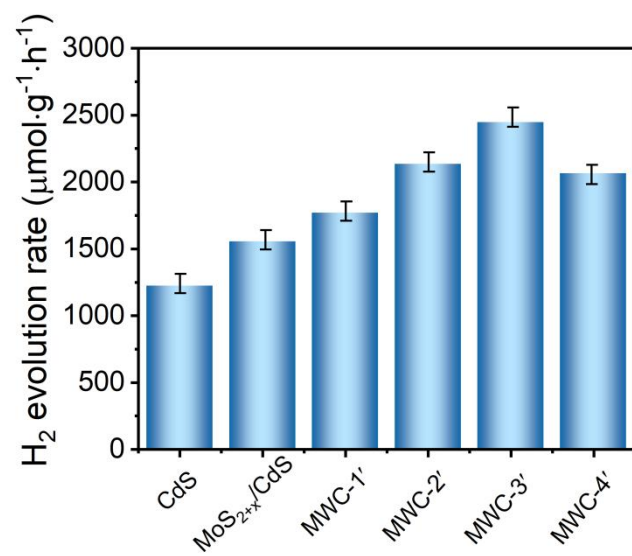

**Figure S7.** Hydrogen evolution rates of CdS, MoS<sub>2+x</sub>/CdS and MWC-x' samples.

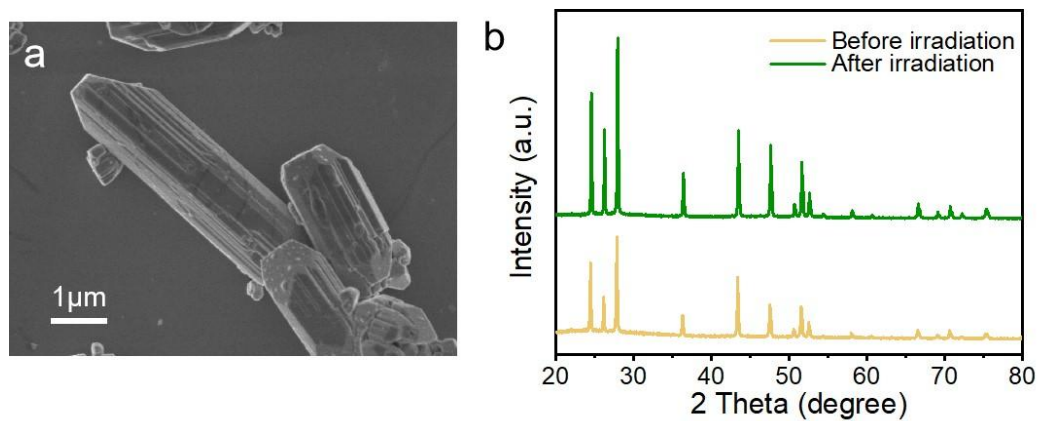

**Figure S8.** SEM images of MWC-3 (a) after 2 h irradiation ( $\lambda \geq 420$  nm). (b) XRD patterns of MWC-3 before and after 2 h irradiation.

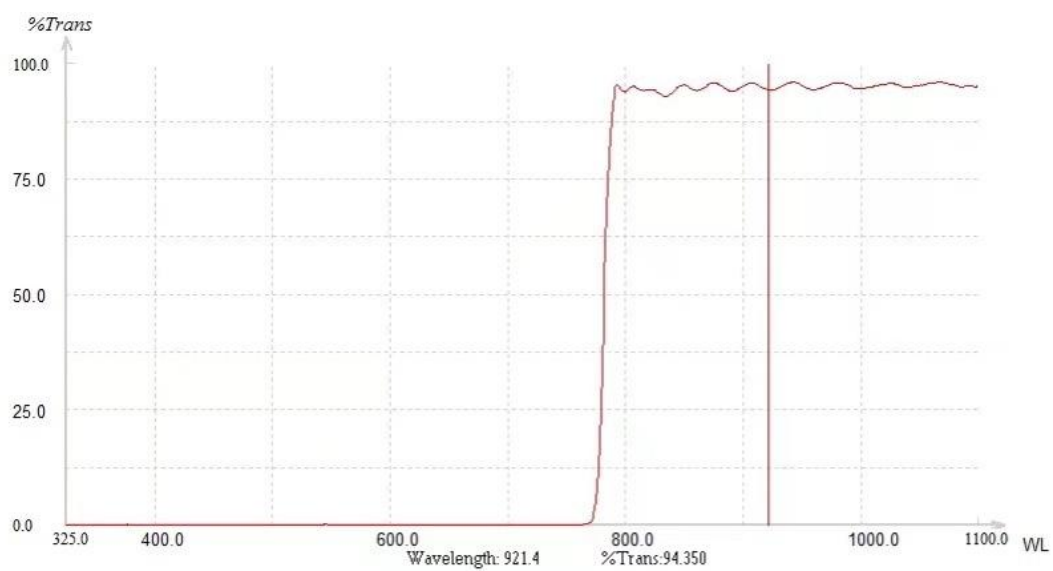

**Figure S9.** The raw data from absorption test of the NIR filter.

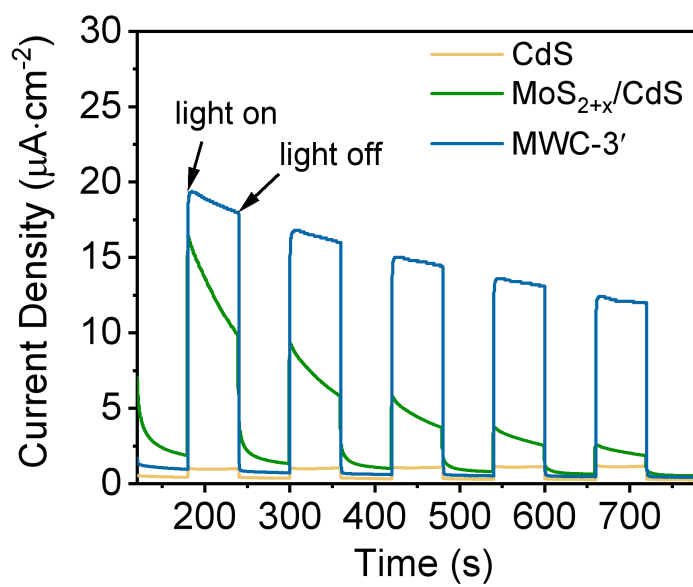

**Figure S10.** Photocurrent curves of CdS, MoS<sub>2+x</sub>/CdS and MWC-3'.

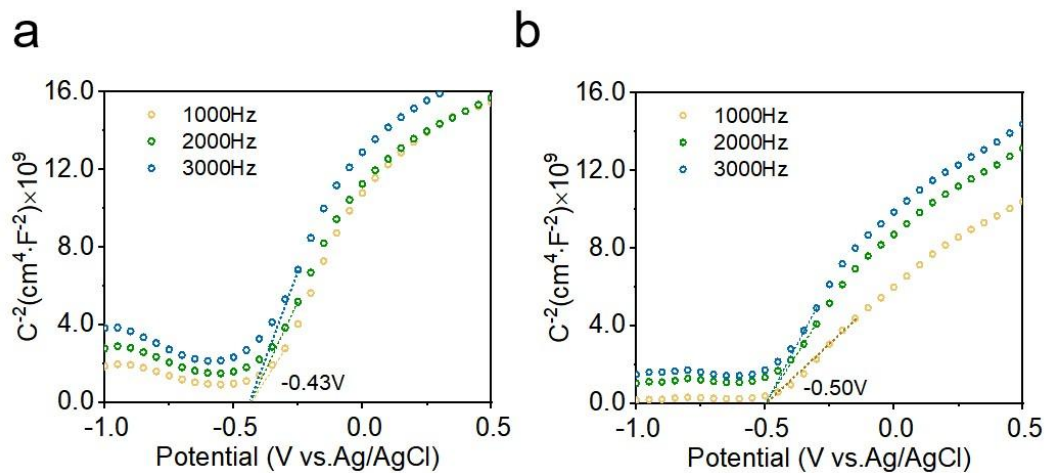

**Figure S11.** Mott-Schottky plots of (a)  $\text{CdS}_v$  and (b)  $\text{MoS}_{2+x}/\text{CdS}_v$  in 0.5 M  $\text{Na}_2\text{SO}_4$  tested at 1000 Hz, 2000 Hz and 3000 Hz, respectively.

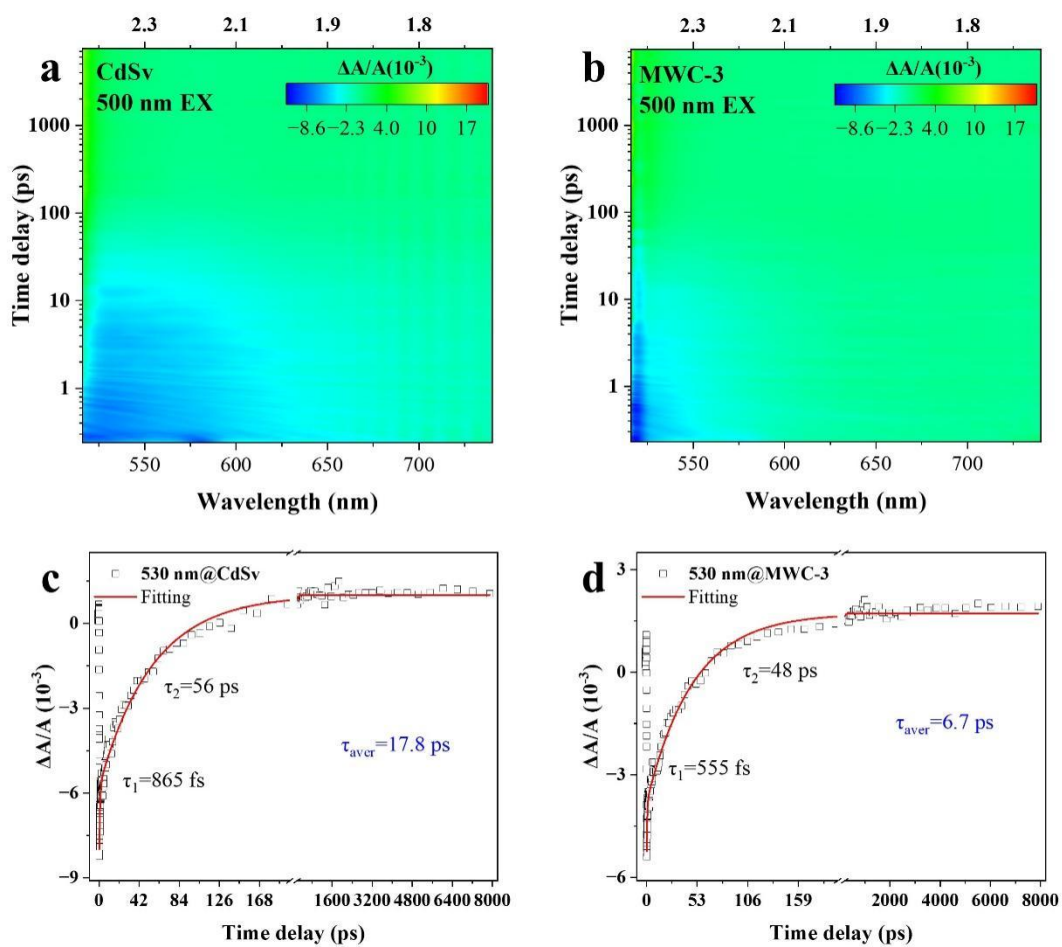

**Fig. S12.** Fs-TA measurements after 500 nm excitation with fluence of  $2.2 \mu\text{J}/\text{pulse}$  at visible region: (a, b) The contour maps of samples upon 500 nm excitation, (c, d) the kinetic fitting at 530 nm for corresponding samples.

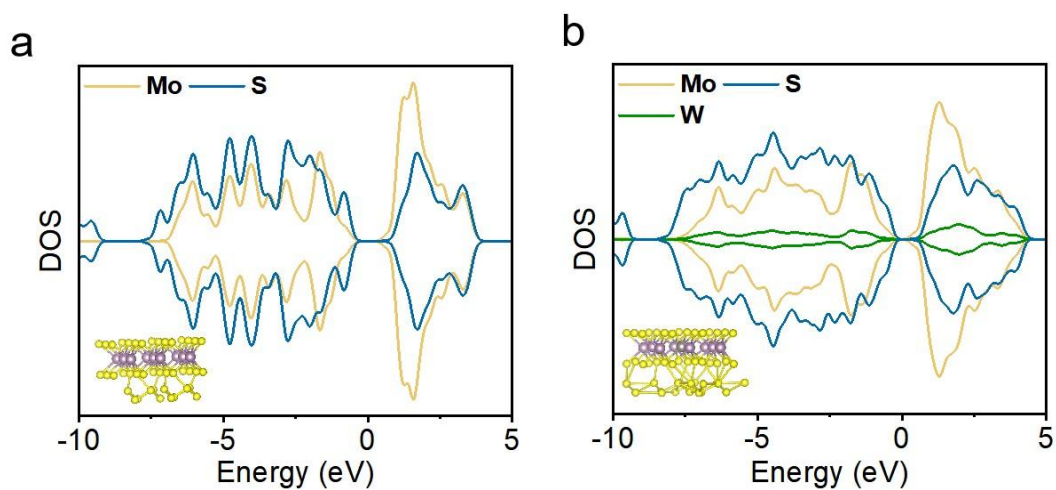

**Figure S13.** Density of states (DOS) diagram for (a) MoS<sub>2+x</sub> and (b) MoWS<sub>2+x</sub> (Illustrations for the respective computational models).

**Table S1.** Calculated quantum yields at different wavelengths.

| $\lambda$ (nm) | $A$ (cm <sup>2</sup> ) | $E$ (mW·cm <sup>-2</sup> ) | Chromatographic indication | $R_{H_2}$ (μmol·h <sup>-1</sup> ) | $QE$   |
|----------------|------------------------|----------------------------|----------------------------|-----------------------------------|--------|
| 390-400        | 2                      | 12.5                       | 1.6043                     | 19.637                            | 19.13% |
| 420-430        | 2                      | 19.8                       | 2.0608                     | 25.2238                           | 14.40% |
| 440-450        | 2                      | 27.3                       | 2.9018                     | 35.5184                           | 14.04% |
| 480-485        | 2                      | 16.2                       | 1.8426                     | 22.553                            | 13.77% |
| 500-510        | 2                      | 13.2                       | 1.1017                     | 13.4848                           | 9.70%  |

**Table S2.** Composition (wt %) of the various samples based on the ICP-AES results.

| Samples                               | S (at.%) | Mo (at.%) | W (at.%) | S/(Mo+W) |
|---------------------------------------|----------|-----------|----------|----------|
| MoWS <sub>2+x</sub> /TiO <sub>2</sub> | 8.64     | 0.019     | 0.039    | > 2      |



**Table S3.** Comparison of H<sub>2</sub> evolution activity between molybdenum disulfide cocatalysts and cadmium sulfide based composite photocatalysts.

| Photocatalysts                          | Light source   | Incident light        | Photocatalytic performance                                                           | AQY                | Ref.      |
|-----------------------------------------|----------------|-----------------------|--------------------------------------------------------------------------------------|--------------------|-----------|
| CdS/Mo-VC                               | 300 W Xe light | $\lambda \geq 420$ nm | H <sub>2</sub> rate: 2267 $\mu\text{mol} \cdot \text{g}^{-1} \cdot \text{h}^{-1}$    | 4.3%<br>(420 nm)   | [1]       |
| MoWS <sub>2+x</sub> /TiO <sub>2</sub>   | 4 LED light    | $\lambda \geq 365$ nm | H <sub>2</sub> rate: 4620.8 $\mu\text{mol} \cdot \text{g}^{-1} \cdot \text{h}^{-1}$  | 22.2%<br>(365 nm)  | [2]       |
| TiO <sub>2</sub> /Au@MoS <sub>2+x</sub> | 4 LED light    | $\lambda \geq 365$ nm | H <sub>2</sub> rate: 7858.1 $\mu\text{mol} \cdot \text{g}^{-1} \cdot \text{h}^{-1}$  | 38.1%<br>(365 nm)  | [3]       |
| NiCd/CdS                                | 300 W Xe light | $\lambda > 410$ nm    | H <sub>2</sub> rate: 11570 $\mu\text{mol} \cdot \text{g}^{-1} \cdot \text{h}^{-1}$   | /                  | [4]       |
| RuMoS <sub>2+x</sub> /TiO <sub>2</sub>  | 4 LED light    | $\lambda \geq 365$ nm | H <sub>2</sub> rate: 2649.3 $\mu\text{mol} \cdot \text{g}^{-1} \cdot \text{h}^{-1}$  | 10.73%<br>(365 nm) | [5]       |
| ZnO/CdS/MoS <sub>2</sub>                | 300 W Xe light | $\lambda \geq 420$ nm | H <sub>2</sub> rate: 10247.4 $\mu\text{mol} \cdot \text{g}^{-1} \cdot \text{h}^{-1}$ | /                  | [6]       |
| CdS-MoS <sub>2</sub> -CoO <sub>x</sub>  | 300 W Xe light | $\lambda \geq 420$ nm | H <sub>2</sub> rate: 7400 $\mu\text{mol} \cdot \text{g}^{-1} \cdot \text{h}^{-1}$    | 7.6%<br>(420nm)    | [7]       |
| MoSe <sub>2</sub> /CdS                  | 300 W Xe light | $\lambda \geq 420$ nm | H <sub>2</sub> rate: 4700 $\mu\text{mol} \cdot \text{g}^{-1} \cdot \text{h}^{-1}$    | 15.6%<br>(450 nm)  | [8]       |
| CdS/MoC                                 | 300 W Xe light | $\lambda \geq 420$ nm | H <sub>2</sub> rate: 224.5 $\mu\text{mol} \cdot \text{g}^{-1} \cdot \text{h}^{-1}$   | 7.6%<br>(420 nm)   | [9]       |
| MoWS <sub>2+x</sub> /CdS <sub>v</sub>   | 300 W Xe light | $\lambda \geq 420$ nm | H <sub>2</sub> rate: 9166.13 $\mu\text{mol} \cdot \text{g}^{-1} \cdot \text{h}^{-1}$ | 19.13%<br>(390 nm) | This work |

**Table S4.** The calculated carrier density of CdS<sub>v</sub>, MoS<sub>2+x</sub>/CdS<sub>v</sub>, MWC-3 at 1000 Hz, 2000 Hz and 3000 Hz, respectively.

| Frequency | Carrier Density (cm <sup>-3</sup> ) |                                      |                       |
|-----------|-------------------------------------|--------------------------------------|-----------------------|
|           | CdS <sub>v</sub>                    | MoS <sub>2+x</sub> /CdS <sub>v</sub> | MWC-3                 |
| 1000Hz    | 5.73×10 <sup>21</sup>               | 7.63×10 <sup>21</sup>                | 9.11×10 <sup>21</sup> |
| 2000Hz    | 4.28×10 <sup>21</sup>               | 4.66×10 <sup>21</sup>                | 6.73×10 <sup>21</sup> |
| 3000Hz    | 3.85×10 <sup>21</sup>               | 4.13×10 <sup>21</sup>                | 5.12×10 <sup>21</sup> |

**Table S5.** Kinetic fitting parameters for MWC-3 and CdS<sub>v</sub> at 1273 nm upon 410 nm excitation.

| Sample           | λ (nm) | τ <sub>1</sub> /ps | A <sub>1</sub> (%) | τ <sub>2</sub> /ps | A <sub>2</sub> (%) | τ <sub>aver</sub> /ps |
|------------------|--------|--------------------|--------------------|--------------------|--------------------|-----------------------|
| MWC-3            | 1273   | 12.1               | 86.2               | 77.6               | 13.8               | 21.2                  |
| CdS <sub>v</sub> | 1273   | 10.1               | 59.7               | 104.5              | 40.3               | 48.2                  |

**Table S6.** Kinetic fitting parameters for MWC-3 and CdS<sub>v</sub> at 1273 nm wavelengths upon 500 nm excitation.

| Sample           | λ (nm) | τ <sub>1</sub> /ps | A <sub>1</sub> (%) | τ <sub>2</sub> /ps | A <sub>2</sub> (%) | τ <sub>aver</sub> /ps |
|------------------|--------|--------------------|--------------------|--------------------|--------------------|-----------------------|
| MWC-3            | 1273   | 4.1                | 59.5               | 106                | 40.5               | 45.4                  |
| CdS <sub>v</sub> | 1273   | NA                 | NA                 | NA                 | NA                 | NA*                   |

Note: NA\* means that there is no absorption peak at 1273 nm for the corresponding sample, so it is not applicable (NA).

## References

- [1] Y. Lei, K.H. Ng, Y. Zhu, Y. Zhang, Z. Li, S. Xu, J. Huang, J. Hu, Z. Chen, W. Cai, Y. Lai, *Chem. Eng. J.*, 452 (2023) 139325.
- [2] D. Gao, B. Zhao, L. Wang, E. Aslan, I. Hatay Patir, J. Yu, H. Yu, *Chem. Eng. J.*, 449 (2022) 137803.
- [3] D. Gao, P. Deng, J. Zhang, L. Zhang, X. Wang, H. Yu, J. Yu, *Angew. Chem., Int. Ed.*, 62 (2023) e202304559.
- [4] B. Wang, S. He, L. Zhang, X. Huang, F. Gao, W. Feng, P. Liu, *Appl. Catal. B: Environ.*, 243 (2019) 229-235.
- [5] W. Zhong, D. Gao, P. Wang, X. Wang, H. Yu, *Appl. Catal. B: Environ.*, 319 (2022) 121910.
- [6] Y. Jia, Z. Wang, X.-Q. Qiao, L. Huang, S. Gan, D. Hou, J. Zhao, C. Sun, D.-S. Li, *Chem. Eng. J.*, 424 (2021) 130368.
- [7] T. Di, Q. Deng, G. Wang, S. Wang, L. Wang, Y. Ma, *J. Mater. Sci. Technol.*, 124 (2022) 209-216.
- [8] X. Yang, W. Liu, C. Han, C. Zhao, H. Tang, Q. Liu, J. Xu, *Mater. Today Phys.*, 15 (2020) 100261.
- [9] Y. Lei, X. Wu, S. Li, J. Huang, K.H. Ng, Y. Lai, *J. Cleaner Prod.*, 322 (2021) 129018.
